# Supplementary material for: Fecal microbiota transplantation confers beneficial metabolic effects of diet and exercise on diet-induced obese mice
Source: PubMed Central journal article supplement (PMC6199268; doi:10.1038/s41598-018-33893-y), 2018-10-23
Supplement: 41598_2018_33893_MOESM1_ESM.pdf [file 41598_2018_33893_MOESM1_ESM.pdf]

## Supplementary file – Supplementary information

### Fecal microbiota transplantation confers beneficial metabolic effects of diet and exercise on diet-induced obese mice

Zi-Lun Lai<sup>1†</sup>, Ching-Hung Tseng<sup>2†</sup>, Hsiu J. Ho<sup>1</sup>, Cynthia K. Y. Cheung<sup>3</sup>, Jian-Yong Lin<sup>2</sup>, Yi-Ju Chen<sup>4,5</sup>, Fu-Chou Cheng<sup>6</sup>, Yao-Chun Hsu<sup>7,8</sup>, Jaw-Town Lin<sup>9,10</sup>, Emad M. El-Omar<sup>11\*</sup> and Chun-Ying Wu<sup>1,4,8,12-15\*</sup>

<sup>1</sup>Division of Gastroenterology, Taichung Veterans General Hospital, <sup>2</sup>Germark Biotechnology Co., Ltd., Taichung, Taiwan; <sup>3</sup>Institute of Digestive Disease, the Chinese University of Hong Kong, Shatin, Hong Kong; <sup>4</sup>Faculty of Medicine and Graduate Institute of Clinical Medicine, National Yang-Ming University, Taipei, Taiwan; <sup>5</sup>Department of Dermatology, <sup>6</sup>Stem Cell Center, Department of Medical Research, Taichung Veterans General Hospital, Taichung, Taiwan; <sup>7</sup>Department of Internal Medicine, E-Da Hospital/I-Shou University, Kaohsiung, Taiwan; <sup>8</sup>Graduate Institute of Clinical Medicine, China Medical University, Taichung, Taiwan; <sup>9</sup>School of Medicine, Fu Jen Catholic University, New Taipei City, Taiwan; <sup>10</sup>Institute of Population Health Sciences, National Health Research Institutes, Miaoli, Taiwan; <sup>11</sup>Microbiome Research Centre, St George and Sutherland Clinical School, University of New South Wales, Sydney, Australia; <sup>12</sup>Division of Translational Research, Taipei Veterans General Hospital; <sup>13</sup>National Institute of Cancer Research, National Health Research Institutes, Miaoli, Taiwan; <sup>14</sup>Department of Public Health, China Medical University, <sup>15</sup>Department of Life Sciences and Rong Hsing Research Center for Translational Medicine, National Chung-Hsing University, Taichung, Taiwan.

†Authors contribute equality to this work.

\*Authors share co-corresponding authorship.

## Note

Supplementary Note 1. Effects of two-day antibiotics exposure on obesity.

Supplementary Note 2. qPCR of *Tlr4*, *Nod1* and *Nod2*.

## Figure

Supplementary Figure 1. Body weight gain and IPGTT results in H and H\_ABX.

Supplementary Figure 2. IPGTT curves for each mouse group.

Supplementary Figure 3. Histological examination of liver and fat pad tissues.

Supplementary Figure 4. Interaction plot of diet and exercise to Shannon diversity.

Supplementary Figure 5. LEfSe comparisons among FMT donors and recipients.

Supplementary Figure 6. Expression of *Tlr4*, *Nod1* and *Nod2*.

Supplementary Figure 7. Detailed strain information of OTUs in NCBI database.

## Table

Supplementary Table 1. Body weights data of H and H\_ABX.

Supplementary Table 2. IPGTT results of H and H\_ABX.

Supplementary Table 3. Mouse physiological parameters and gene expression data.

Supplementary Table 4. COGs of energy production enriched in HE than H.

Supplementary Table 5. COGs of carbohydrate metabolism enriched in HE than H.

Supplementary Table 6. Expression data of *Tlr4*, *Nod1* and *Nod2*.

Supplementary Table 7. Magnitude of abundance changes in taxa by FMT.

Supplementary Table 8. List of primers and probes used in qPCR.

## References

## Note

### Supplementary Note 1. Effects of two-day antibiotics exposure on obesity.

Antibiotics ciprofloxacin (0.2 g/L) and metronidazole (1 g/L) was added to the drinking water of FMT recipients for two days before FMT was performed to ensure that the outcomes are compatible with the clinical guidelines for FMT in humans.

Early-life antibiotics exposure predisposes hosts to obesity<sup>1</sup>. To verify this effect, a supplementary H\_ABX group of mice ( $n = 8$ ) was raised in identical conditions to H but underwent the same antibiotics regimen as FMT recipients and received daily gavage of normal saline (100  $\mu$ l) as vehicle FMT. H\_ABX mice were raised for 8 weeks as they were assumed to have no differences to H regarding phenotypic and metabolic profiles. H\_ABX mice were exposed to antibiotics for two days prior to week 6 as they did not receive assimilation training.

Throughout the feeding period, the food consumption (adjusted to  $n = 8$ ) of H mice was 144 g/week, and that of H\_ABX mice was 136 g/week; the food efficacy of H mice was 6.045 (gw weight gain per 100 g food consumed) and that of H\_ABX was 6.072. The results showed no difference in feeding behaviors of H and H\_ABX.

H and H\_ABX mice after 8-week high-fat diet were compared for body weight gains and IPGTT results (Supplementary Table 1 and 2). As the results, differences in body weight gain were not significant (Supplementary Figure 1A), but that in glucose tolerance were significantly higher in H\_ABX than H (Supplementary Figure 1B and 1C). The results were in agreement with the previous study<sup>2</sup>, and suggested that the applied antibiotics regimen predisposed high fat diet-fed mice to physiological changes associated with obesity.

## Supplementary Note 2. qPCR of *Tlr4*, *Nod1* and *Nod2*.

Bacterial lipopolysaccharide<sup>3</sup> and peptidoglycan<sup>4</sup> are known to alter host metabolism and inflammation during metabolic endotoxemia. Bacterial lipopolysaccharide triggers downstream pathways by activating Toll-like receptor 4 (TLR4) and peptidoglycan by activating nucleotide-binding oligomerization domain-containing (NOD) proteins, NOD1 and NOD2. To evaluate the associations between FMT and metabolic endotoxemia, the gene expressions of *Tlr4*, *Nod1* and *Nod2* were determined using quantitative polymerase chain reaction (qPCR) in mice liver tissue.

The qPCR protocols for *Tlr4*, *Nod1* and *Nod2* were identical to those mentioned in main text, but glyceraldehyde 3-phosphate dehydrogenase (*Gapdh*) was used as the internal control. Three mice from H\_FHE and H\_FNE (i.e., the major treatment groups) and two mice from other groups were randomly selected. Expression data (expressed in  $2^{-\Delta\Delta C_t}$ ) are in Supplementary Table 6 and the qPCR primers for *Tlr4*, *Nod1*, *Nod2* and *Gapdh* are in Supplementary Table 8.

## Figure

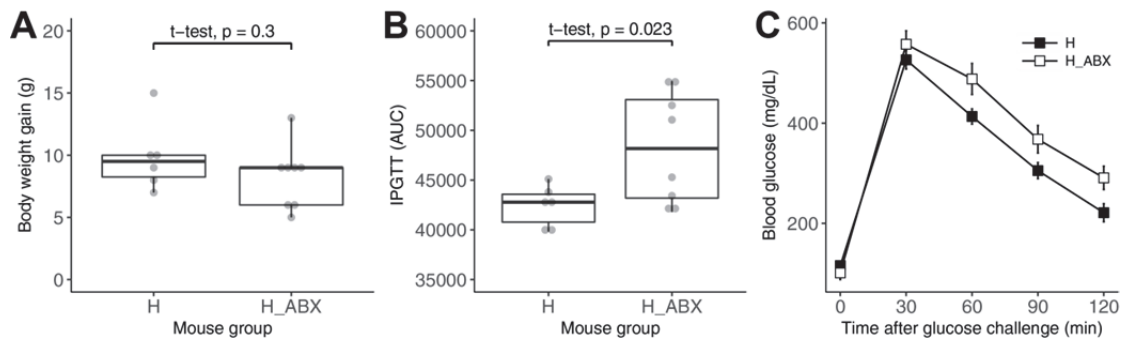

**Supplementary Figure 1. Body weight gain and IPGTT results in H and H\_ABX.** Body weight gains between H ( $n = 6$ ) and the additional H\_ABX group ( $n = 8$ ) from week 8 to 14 (see Supplementary Note 1) was tested by Student's *t*-test. Data points for body weight gain and AUC after 8-week high-fat diet are labeled with semi-transparency. Time-course data of IPGTT are mean  $\pm$  SE every 30 minutes until 2 hours after glucose challenge.

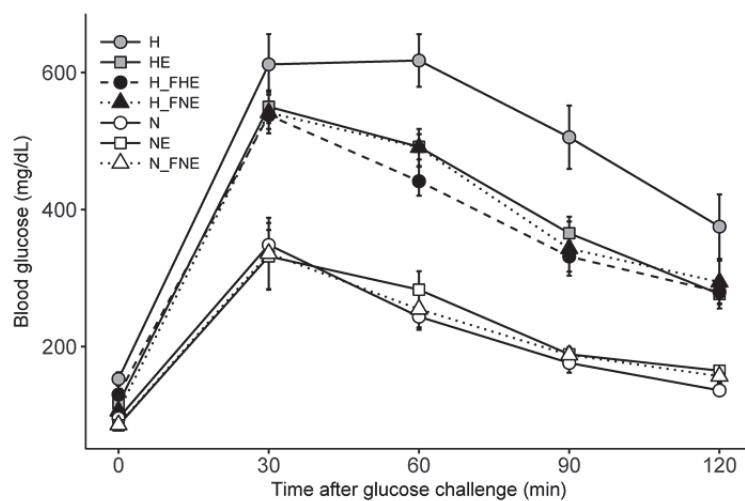

**Supplementary Figure 2. IPGTT curves for each mouse group.** IPGTT was measured monthly throughout the experiment, and the last measurement (at week 24) was presented. The data are mean  $\pm$  SE, measured every 30 minutes until 2 hours after glucose challenge.

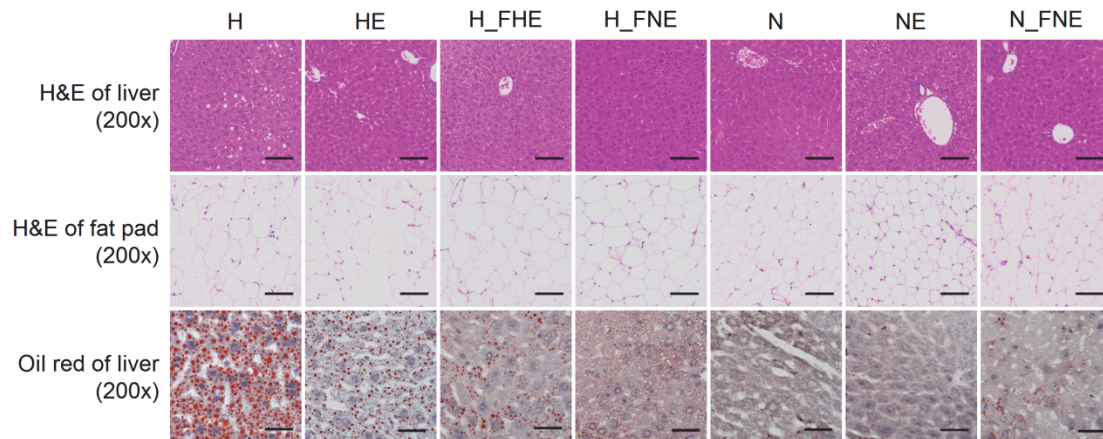

**Supplementary Figure 3. Histological examination of liver and fat pad tissues.** Haematoxylin & eosin (H&E) staining were applied to liver and fat pad tissues. Oil red O staining was applied to fat pad tissue as well. Mouse groups are labeled on top of each column in figure. Scale bar represents 100  $\mu\text{m}$ .

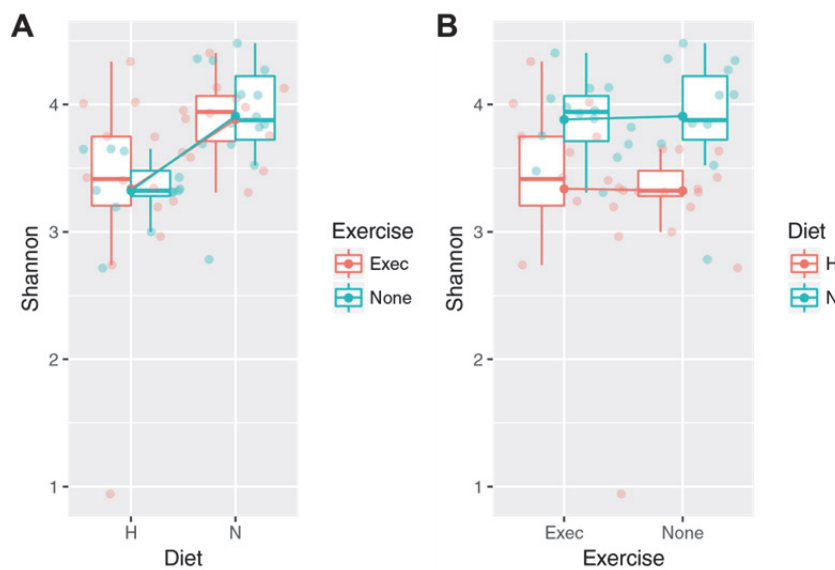

**Supplementary Figure 4. Interaction plot of diet and exercise to Shannon diversity.** (A) Different diet types were compared with exercise status. (B) Different exercise status were compared with diet types.

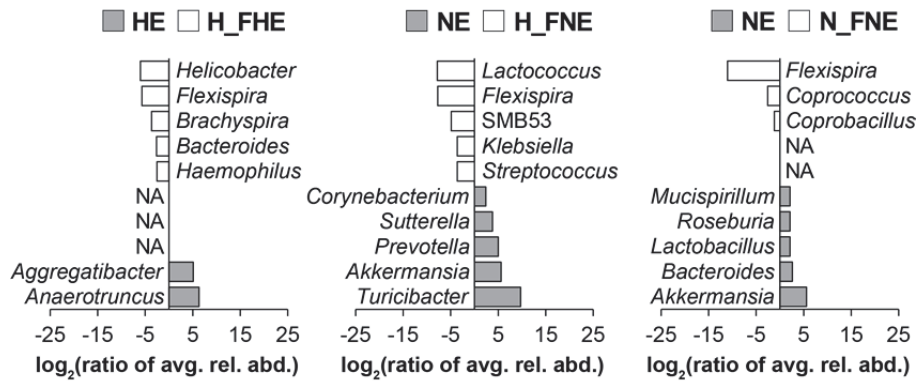

**Supplementary Figure 5. LefSe comparisons among FMT donors and recipients.**

Top five genera with contrasting abundances between compared groups are listed. NA, not applicable.

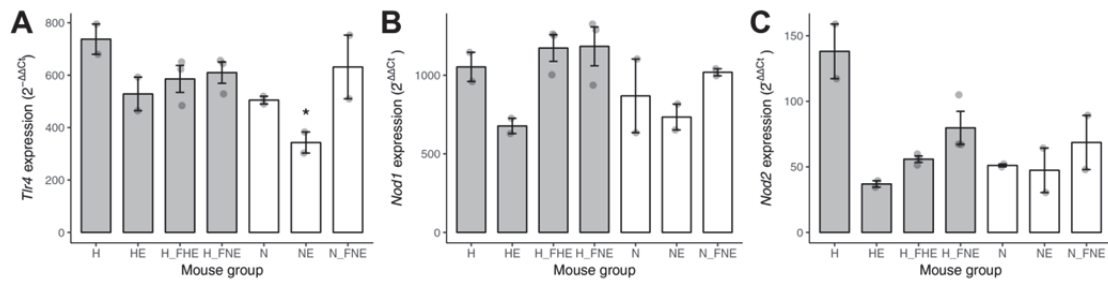

**Supplementary Figure 6. Expression of *Tlr4*, *Nod1* and *Nod2*.** (A) Expression of *Tlr4* gene. (B) Expression of *Nod1* gene. (C) Expression of *Nod2* gene. Data points are labeled with semi-transparency. The data are mean ± SE. \*p < 0.05, \*\*p < 0.01, \*\*\*p < 0.001 (Student's t-test, vs. H).

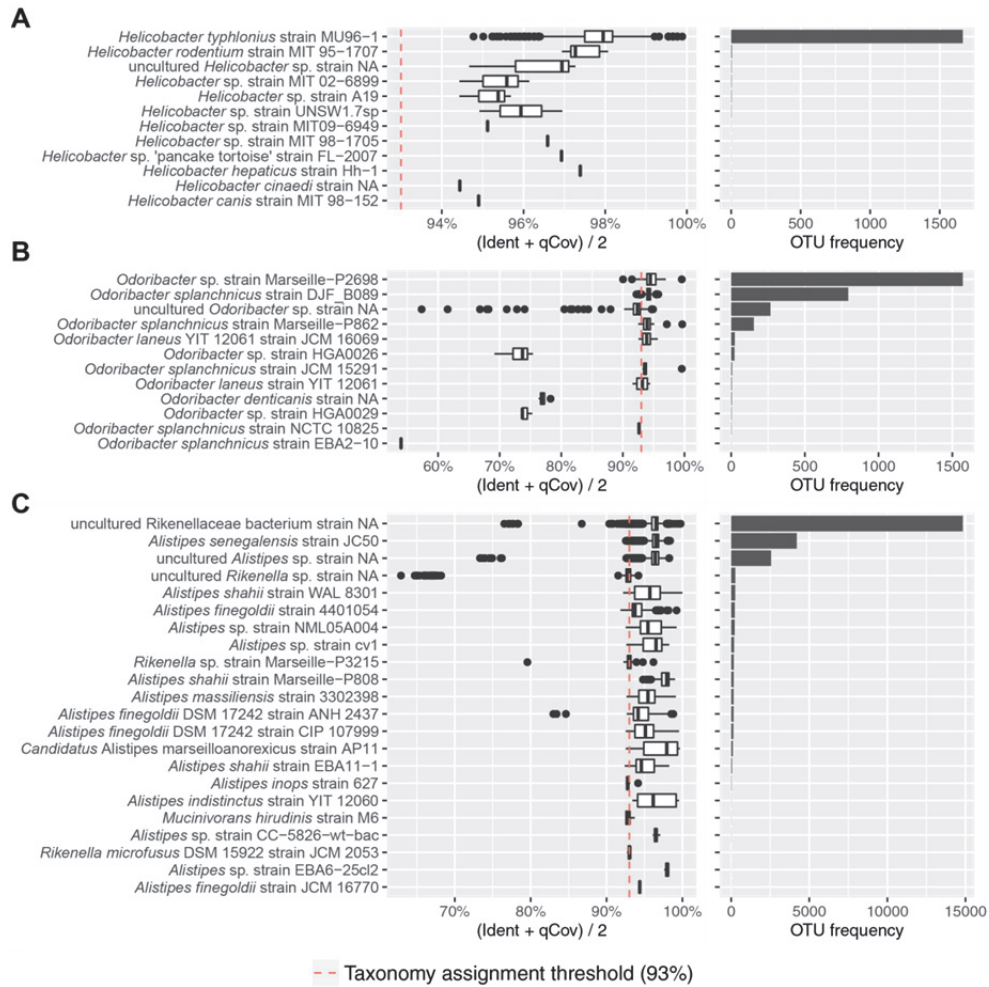

**Supplementary Figure 7. Detailed strain information of OTUs in NCBI database.** (A) *Helicobacter* OTUs. (B) *Odoribacter* OTUs. (C) AF12 OTUs. The representative sequences of OTUs were search against NCBI RefSeq database using BLASTn. The distribution of matched identity (Ident) and query coverage (qCov) and respective frequency of matched taxa (in strain, if available) were summarized.



## Table

**Supplementary Table 1. Body weight of H and H\_ABX.** Data are mouse weekly body weight (g) of H and H\_ABX. H received no antibiotics exposure, and H\_ABX was exposed to ciprofloxacin (0.2 g/L) and metronidazole (1 g/L) through drinking water for two days before week 6.

| Group | Mouse ID | Week                     |                           |    |    |    |    |    |    |    |            |    |
|-------|----------|--------------------------|---------------------------|----|----|----|----|----|----|----|------------|----|
|       |          | 6                        | 7                         | 8  | 9  | 10 | 11 | 12 | 13 | 14 | 15         | 16 |
| H     | H-0401   |                          |                           | 21 | 24 | 23 | 25 | 26 | 28 | 28 | 31         | 31 |
|       | H-0402   |                          |                           | 23 | 26 | 25 | 25 | 27 | 28 | 29 | 31         | 30 |
|       | H-0403   | Assimilation<br>training |                           | 20 | 23 | 22 | 22 | 23 | 24 | 25 | 28         | 28 |
|       | H-0404   |                          | 23                        | 28 | 28 | 29 | 32 | 33 | 36 | 38 | 38         |    |
|       | H-0405   |                          | 20                        | 23 | 23 | 24 | 26 | 26 | 28 | 30 | 30         |    |
|       | H-0407   |                          | 21                        | 24 | 23 | 24 | 26 | 27 | 28 | 29 | 30         |    |
|       | H-0406   |                          | Mouse recalcitrant to HFD |    |    |    |    |    |    |    |            |    |
| H_ABX | HFD 0101 | 24                       | 24                        | 24 | 23 | 25 | 26 | 28 | 28 | 30 |            |    |
|       | HFD 0102 | 19                       | 19                        | 19 | 22 | 24 | 25 | 26 | 26 | 28 |            |    |
|       | HFD 0103 | 20                       | 21                        | 18 | 20 | 22 | 23 | 25 | 23 | 26 |            |    |
|       | HFD 0104 | 22                       | 23                        | 23 | 24 | 27 | 28 | 29 | 30 | 31 | Sacrificed |    |
|       | HFD 0105 | 21                       | 23                        | 22 | 24 | 25 | 26 | 28 | 28 | 30 |            |    |
|       | HFD 0106 | 21                       | 23                        | 22 | 26 | 26 | 28 | 29 | 29 | 30 |            |    |
|       | HFD 0107 | 21                       | 17                        | 18 | 27 | 30 | 31 | 31 | 32 | 34 |            |    |
|       | HFD 0108 | 21                       | 18                        | 20 | 21 | 22 | 26 | 26 | 25 | 26 |            |    |

**Supplementary Table 2. IPGTT results of H and H\_ABX.** Time course data of blood glucose concentration (mg/dL) and AUC of H and H\_ABX are presented.

| Group              | Mouse ID | Time after glucose challenge (min) |     |     |     |     | AUC   |
|--------------------|----------|------------------------------------|-----|-----|-----|-----|-------|
|                    |          | 0                                  | 30  | 60  | 90  | 120 |       |
| H<br>(week 16)     | H-0401   | 110                                | 568 | 410 | 350 | 241 | 45105 |
|                    | H-0402   | 108                                | 526 | 441 | 298 | 222 | 42900 |
|                    | H-0403   | 100                                | 591 | 348 | 269 | 161 | 40155 |
|                    | H-0404   | 135                                | 503 | 454 | 343 | 185 | 43800 |
|                    | H-0405   | 125                                | 494 | 402 | 253 | 232 | 39825 |
|                    | H-0407   | 117                                | 476 | 425 | 319 | 287 | 42660 |
|                    | H-0406   | Mouse recalcitrant to HFD          |     |     |     |     | NA    |
| H_ABX<br>(week 14) | HFD 0101 | 90                                 | 539 | 461 | 331 | 267 | 45285 |
|                    | HFD 0102 | 112                                | 500 | 372 | 351 | 276 | 42510 |
|                    | HFD 0103 | 14                                 | 516 | 513 | 262 | 189 | 41775 |
|                    | HFD 0104 | 128                                | 654 | 425 | 385 | 348 | 51060 |
|                    | HFD 0105 | 127                                | 485 | 538 | 534 | 412 | 54795 |
|                    | HFD 0106 | 121                                | 493 | 399 | 358 | 274 | 43425 |
|                    | HFD 0107 | 98                                 | 598 | 585 | 387 | 263 | 52515 |
|                    | HFD 0108 | 121                                | 675 | 612 | 335 | 298 | 54945 |

**Supplementary Table 3. Mouse physiological parameters and gene expression data.** Data are 5% truncated mean  $\pm$  SE, with truncated sample size  $n$  in parenthesis.

| Group | Fat weight (g)                          | Fasting blood glucose (mg/dL)            | IPGTT (AUC)              | <i>Tnf</i> ( $2^{-\Delta\Delta C_t}$ ) |
|-------|-----------------------------------------|------------------------------------------|--------------------------|----------------------------------------|
| H     | 2.00 $\pm$ 0.13 (4)                     | 155.8 $\pm$ 5.0 (4)                      | 59486.3 $\pm$ 2627.4 (4) | 0.17 $\pm$ 0.04 (4)                    |
| HE    | 0.95 $\pm$ 0.05 (5)                     | 123.4 $\pm$ 4.4 (5)                      | 48993.0 $\pm$ 899.1 (5)  | 0.25 $\pm$ 0.05 (5)                    |
| H_FHE | 1.30 $\pm$ 0.16 (5)                     | 127.0 $\pm$ 16.2 (5)                     | 44547.5 $\pm$ 1976.4 (6) | 0.06 $\pm$ 0.01 (5)                    |
| H_FNE | 1.08 $\pm$ 0.25 (5)                     | 103.0 $\pm$ 9.7 (5)                      | 47178.0 $\pm$ 2568.5 (5) | 0.10 $\pm$ 0.02 (5)                    |
| N     | 0.33 $\pm$ 0.03 (5)                     | 92.4 $\pm$ 6.6 (5)                       | 25758.0 $\pm$ 1131.7 (5) | 0.12 $\pm$ 0.02 (5)                    |
| NE    | 0.36 $\pm$ 0.02 (5)                     | 85.3 $\pm$ 1.8 (4)                       | 28567.5 $\pm$ 1626.5 (4) | 0.19 $\pm$ 0.07 (4)                    |
| N_FNE | 0.26 $\pm$ 0.03 (5)                     | 86.2 $\pm$ 1.5 (5)                       | 25848.0 $\pm$ 823.8 (5)  | 0.12 $\pm$ 0.01 (5)                    |
| Group | <i>Illa</i> ( $2^{-\Delta\Delta C_t}$ ) | <i>Pparg</i> ( $2^{-\Delta\Delta C_t}$ ) | ALT (U/L)                | LDL (mg/dL)                            |
| H     | 0.27 $\pm$ 0.02 (4)                     | 0.17 $\pm$ 0.02 (4)                      | 40.70 $\pm$ 2.68 (4)     | 22.65 $\pm$ 0.48 (4)                   |
| HE    | 0.18 $\pm$ 0.02 (5)                     | 0.10 $\pm$ 0.01 (5)                      | 25.68 $\pm$ 1.21 (5)     | 15.28 $\pm$ 0.97 (5)                   |
| H_FHE | 0.17 $\pm$ 0.01 (5)                     | 0.13 $\pm$ 0.01 (5)                      | 22.48 $\pm$ 0.69 (5)     | 14.06 $\pm$ 1.05 (5)                   |
| H_FNE | 0.16 $\pm$ 0.01 (5)                     | 0.15 $\pm$ 0.02 (5)                      | 23.48 $\pm$ 0.32 (5)     | 14.36 $\pm$ 0.18 (5)                   |
| N     | 0.24 $\pm$ 0.02 (5)                     | 0.15 $\pm$ 0.01 (5)                      | 18.56 $\pm$ 0.95 (5)     | 13.02 $\pm$ 0.52 (5)                   |
| NE    | 0.32 $\pm$ 0.07 (4)                     | 0.20 $\pm$ 0.05 (4)                      | 22.03 $\pm$ 1.40 (4)     | 13.40 $\pm$ 0.60 (4)                   |
| N_FNE | 0.17 $\pm$ 0.02 (6)                     | 0.12 $\pm$ 0.01 (5)                      | 22.76 $\pm$ 1.52 (5)     | 11.92 $\pm$ 0.67 (5)                   |

**Supplementary Table 4. COGs of energy production enriched in HE than H.** Data were derived from two-tailed Wilcoxon test on group medians with  $p$  values adjusted by Benjamini-Hochberg (BH) false discovery rate for multiple testing. Difference between group medians (HE minus H) and fold change (HE divide H) were also shown. COGs were sorted in ascending order of adjusted  $p$  values with lexical order of COG descriptions.

| #  | COG ID  | COG description                                                                      | Adjusted $p$ (BH) | HE minus H | HE divide H |
|----|---------|--------------------------------------------------------------------------------------|-------------------|------------|-------------|
| 1  | COG1271 | Cytochrome bd-type quinol oxidase, subunit 1                                         | 0.004             | 1.9E-04    | 2.9         |
| 2  | COG1294 | Cytochrome bd-type quinol oxidase, subunit 2                                         | 0.004             | 1.7E-04    | 2.9         |
| 3  | COG0712 | F0F1-type ATP synthase, delta subunit (mitochondrial oligomycin sensitivity protein) | 0.004             | 1.0E-04    | 1.3         |
| 4  | COG0247 | Fe-S oxidoreductase                                                                  | 0.004             | 3.0E-04    | 2.5         |
| 5  | COG0731 | Fe-S oxidoreductases                                                                 | 0.004             | 1.7E-04    | 3.0         |
| 6  | COG1148 | Heterodisulfide reductase, subunit A and related polyferredoxins                     | 0.004             | 1.2E-04    | 2.7         |
| 7  | COG2048 | Heterodisulfide reductase, subunit B                                                 | 0.004             | 9.6E-05    | 3.1         |
| 8  | COG1150 | Heterodisulfide reductase, subunit C                                                 | 0.004             | 1.1E-04    | 3.0         |
| 9  | COG1726 | Na <sup>+</sup> -transporting NADH:ubiquinone oxidoreductase, subunit NqrA           | 0.004             | 1.7E-04    | 3.2         |
| 10 | COG1805 | Na <sup>+</sup> -transporting NADH:ubiquinone oxidoreductase, subunit NqrB           | 0.004             | 1.7E-04    | 3.2         |
| 11 | COG2869 | Na <sup>+</sup> -transporting NADH:ubiquinone oxidoreductase, subunit NqrC           | 0.004             | 1.7E-04    | 3.2         |
| 12 | COG1347 | Na <sup>+</sup> -transporting NADH:ubiquinone oxidoreductase, subunit NqrD           | 0.004             | 1.7E-04    | 3.2         |
| 13 | COG2209 | Na <sup>+</sup> -transporting NADH:ubiquinone oxidoreductase, subunit NqrE           | 0.004             | 1.7E-04    | 3.2         |
| 14 | COG2871 | Na <sup>+</sup> -transporting NADH:ubiquinone oxidoreductase, subunit NqrF           | 0.004             | 1.7E-04    | 2.9         |
| 15 | COG3005 | Nitrate/TMAO reductases, membrane-bound tetraheme cytochrome c subunit               | 0.004             | 9.5E-05    | 3.7         |
| 16 | COG1866 | Phosphoenolpyruvate carboxykinase (ATP)                                              | 0.004             | 1.3E-04    | 1.6         |
| 17 | COG5016 | Pyruvate/oxaloacetate carboxyltransferase                                            | 0.004             | 1.9E-04    | 1.7         |
| 18 | COG1053 | Succinate dehydrogenase/fumarate reductase, flavoprotein subunit                     | 0.004             | 1.8E-04    | 1.4         |
| 19 | COG1062 | Zn-dependent alcohol dehydrogenases, class III Formate hydrogenlyase subunit         | 0.004             | 8.7E-07    | 10.0        |
| 20 | COG1143 | 6/NADH:ubiquinone oxidoreductase 23 kD subunit (chain I)                             | 0.004             | 4.3E-05    | 1.1         |
| 21 | COG3474 | Cytochrome c2                                                                        | 0.005             | 7.7E-08    | 14.5        |
| 22 | COG4237 | Hydrogenase 4 membrane component (E)                                                 | 0.005             | 8.0E-05    | 3.2         |
| 23 | COG0680 | Ni,Fe-hydrogenase maturation factor                                                  | 0.005             | 6.0E-05    | 3.2         |
| 24 | COG0778 | Nitroreductase                                                                       | 0.005             | 5.6E-04    | 1.3         |
| 25 | COG3051 | Citrate lyase, alpha subunit                                                         | 0.005             | 4.3E-06    | 3.6         |
| 26 | COG3052 | Citrate lyase, gamma subunit                                                         | 0.005             | 4.4E-06    | 3.7         |
| 27 | COG1035 | Coenzyme F420-reducing hydrogenase, beta subunit                                     | 0.005             | 1.5E-04    | 2.8         |
| 28 | COG0056 | F0F1-type ATP synthase, alpha subunit                                                | 0.005             | 7.1E-05    | 1.2         |
| 29 | COG0055 | F0F1-type ATP synthase, beta subunit                                                 | 0.005             | 7.1E-05    | 1.2         |
| 30 | COG0355 | F0F1-type ATP synthase, epsilon subunit (mitochondrial delta subunit)                | 0.005             | 7.1E-05    | 1.2         |
| 31 | COG0356 | F0F1-type ATP synthase, subunit a                                                    | 0.005             | 7.1E-05    | 1.2         |
| 32 | COG0578 | Glycerol-3-phosphate dehydrogenase                                                   | 0.005             | 1.6E-04    | 2.8         |
| 33 | COG0538 | Isocitrate dehydrogenases                                                            | 0.005             | 9.8E-05    | 1.3         |
| 34 | COG0039 | Malate/lactate dehydrogenases                                                        | 0.005             | 1.1E-04    | 1.2         |
| 35 | COG1252 | NADH dehydrogenase, FAD-containing subunit                                           | 0.005             | 1.7E-04    | 2.8         |
| 36 | COG0374 | Ni,Fe-hydrogenase I large subunit                                                    | 0.005             | 7.9E-05    | 3.1         |
| 37 | COG1740 | Ni,Fe-hydrogenase I small subunit                                                    | 0.005             | 7.8E-05    | 3.1         |

|    |         |                                                                                                          |       |         |      |
|----|---------|----------------------------------------------------------------------------------------------------------|-------|---------|------|
| 38 | COG0280 | Phosphotransacetylase                                                                                    | 0.005 | 2.1E-04 | 1.4  |
| 39 | COG0348 | Polyferredoxin                                                                                           | 0.005 | 1.7E-04 | 1.4  |
| 40 | COG1014 | Pyruvate:ferredoxin oxidoreductase and related<br>2-oxoacid:ferredoxin oxidoreductases, gamma<br>subunit | 0.005 | 4.0E-04 | 1.8  |
| 41 | COG1048 | Aconitase A                                                                                              | 0.006 | 4.7E-05 | 1.1  |
| 42 | COG0240 | Glycerol-3-phosphate dehydrogenase                                                                       | 0.006 | 5.3E-05 | 1.1  |
| 43 | COG1969 | Ni,Fe-hydrogenase I cytochrome b subunit                                                                 | 0.006 | 2.6E-05 | 4.6  |
| 44 | COG2878 | Predicted NADH:ubiquinone oxidoreductase,<br>subunit RnfB                                                | 0.006 | 8.3E-05 | 1.3  |
| 45 | COG4660 | Predicted NADH:ubiquinone oxidoreductase,<br>subunit RnfE                                                | 0.006 | 7.8E-05 | 1.2  |
| 46 | COG3069 | C4-dicarboxylate transporter                                                                             | 0.006 | 1.4E-05 | 11.5 |
| 47 | COG1908 | Coenzyme F420-reducing hydrogenase, delta<br>subunit                                                     | 0.006 | 3.5E-05 | 2.6  |
| 48 | COG1052 | Lactate dehydrogenase and related<br>dehydrogenases                                                      | 0.006 | 1.1E-04 | 1.1  |
| 49 | COG3488 | Predicted thiol oxidoreductase                                                                           | 0.006 | 5.9E-05 | 2.9  |
| 50 | COG0674 | Pyruvate:ferredoxin oxidoreductase and related<br>2-oxoacid:ferredoxin oxidoreductases, alpha<br>subunit | 0.006 | 3.8E-04 | 1.5  |
| 51 | COG1013 | Pyruvate:ferredoxin oxidoreductase and related<br>2-oxoacid:ferredoxin oxidoreductases, beta<br>subunit  | 0.006 | 3.4E-04 | 1.8  |
| 52 | COG0479 | Succinate dehydrogenase/fumarate reductase,<br>Fe-S protein subunit                                      | 0.006 | 1.6E-04 | 2.3  |
| 53 | COG0372 | Citrate synthase                                                                                         | 0.007 | 3.6E-05 | 1.1  |
| 54 | COG2009 | Succinate dehydrogenase/fumarate reductase,<br>cytochrome b subunit                                      | 0.007 | 1.9E-06 | 3.5  |
| 55 | COG1951 | Tartrate dehydratase alpha subunit/Fumarate<br>hydratase class I, N-terminal domain                      | 0.007 | 8.0E-05 | 1.2  |
| 56 | COG0526 | Thiol-disulfide isomerase and thioredoxins                                                               | 0.007 | 5.1E-04 | 2.5  |
| 57 | COG0281 | Malic enzyme                                                                                             | 0.007 | 9.4E-05 | 1.3  |
| 58 | COG4659 | Predicted NADH:ubiquinone oxidoreductase,<br>subunit RnfG                                                | 0.007 | 4.5E-05 | 1.1  |
| 59 | COG1139 | Uncharacterized conserved protein containing a<br>ferredoxin-like domain                                 | 0.007 | 8.8E-05 | 1.8  |
| 60 | COG1979 | Uncharacterized oxidoreductases, Fe-dependent<br>alcohol dehydrogenase family                            | 0.007 | 1.1E-04 | 1.2  |
| 61 | COG1146 | Ferredoxin                                                                                               | 0.008 | 1.7E-05 | 2.6  |
| 62 | COG2225 | Malate synthase                                                                                          | 0.008 | 1.6E-05 | 2.5  |
| 63 | COG2414 | Aldehyde:ferredoxin oxidoreductase                                                                       | 0.009 | 3.3E-05 | 2.5  |
| 64 | COG0243 | Anaerobic dehydrogenases, typically<br>selenocysteine-containing                                         | 0.009 | 1.2E-04 | 1.5  |
| 65 | COG4802 | Ferredoxin-thioredoxin reductase, catalytic<br>subunit                                                   | 0.009 | 1.7E-05 | 2.7  |
| 66 | COG2181 | Nitrate reductase gamma subunit                                                                          | 0.009 | 3.2E-05 | 2.5  |
| 67 | COG3808 | Inorganic pyrophosphatase                                                                                | 0.010 | 1.4E-04 | 2.0  |
| 68 | COG3761 | NADH:ubiquinone oxidoreductase 17.2 kD<br>subunit                                                        | 0.010 | 6.6E-08 | Inf  |
| 69 | COG4657 | Predicted NADH:ubiquinone oxidoreductase,<br>subunit RnfA                                                | 0.010 | 6.4E-05 | 1.2  |
| 70 | COG4232 | Thiol:disulfide interchange protein                                                                      | 0.010 | 2.7E-04 | 2.4  |
| 71 | COG2857 | Cytochrome c1                                                                                            | 0.011 | 1.1E-07 | 5.1  |
| 72 | COG4231 | Indolepyruvate ferredoxin oxidoreductase, alpha<br>and beta subunits                                     | 0.013 | 2.1E-04 | 1.8  |
| 73 | COG2924 | Fe-S cluster protector protein                                                                           | 0.014 | 1.0E-06 | 8.6  |
| 74 | COG4658 | Predicted NADH:ubiquinone oxidoreductase,<br>subunit RnfD                                                | 0.014 | 7.2E-05 | 1.2  |
| 75 | COG1620 | L-lactate permease                                                                                       | 0.016 | 4.9E-05 | 1.7  |

|    |         |                                                                               |       |         |     |
|----|---------|-------------------------------------------------------------------------------|-------|---------|-----|
| 76 | COG0667 | Predicted oxidoreductases (related to aryl-alcohol dehydrogenases)            | 0.016 | 1.5E-04 | 1.2 |
| 77 | COG1301 | Na <sup>+</sup> /H <sup>+</sup> -dicarboxylate symporters                     | 0.018 | 9.4E-05 | 1.2 |
| 78 | COG2864 | Cytochrome b subunit of formate dehydrogenase                                 | 0.027 | 1.9E-06 | 2.2 |
| 79 | COG2086 | Electron transfer flavoprotein, beta subunit                                  | 0.030 | 9.1E-05 | 1.3 |
| 80 | COG0114 | Fumarase                                                                      | 0.030 | 3.3E-05 | 1.6 |
| 81 | COG3202 | ATP/ADP translocase                                                           | 0.031 | 7.5E-08 | 8.5 |
| 82 | COG1042 | Acyl-CoA synthetase (NDP forming)                                             | 0.034 | 5.7E-05 | 1.7 |
| 83 | COG0633 | Ferredoxin                                                                    | 0.034 | 9.2E-07 | 3.7 |
| 84 | COG1156 | Archaeal/vacuolar-type H <sup>+</sup> -ATPase subunit B                       | 0.039 | 4.0E-05 | 1.1 |
| 85 | COG1394 | Archaeal/vacuolar-type H <sup>+</sup> -ATPase subunit D                       | 0.039 | 4.0E-05 | 1.1 |
| 86 | COG0377 | NADH:ubiquinone oxidoreductase 20 kD subunit and related Fe-S oxidoreductases | 0.039 | 1.0E-04 | 2.2 |
| 87 | COG0649 | NADH:ubiquinone oxidoreductase 49 kD subunit 7                                | 0.039 | 1.0E-04 | 2.2 |
| 88 | COG1005 | NADH:ubiquinone oxidoreductase subunit 1 (chain H)                            | 0.039 | 1.0E-04 | 2.2 |
| 89 | COG0713 | NADH:ubiquinone oxidoreductase subunit 11 or 4L (chain K)                     | 0.039 | 1.0E-04 | 2.2 |
| 90 | COG1007 | NADH:ubiquinone oxidoreductase subunit 2 (chain N)                            | 0.039 | 1.0E-04 | 2.2 |
| 91 | COG0838 | NADH:ubiquinone oxidoreductase subunit 3 (chain A)                            | 0.039 | 1.0E-04 | 2.2 |
| 92 | COG1008 | NADH:ubiquinone oxidoreductase subunit 4 (chain M)                            | 0.039 | 1.0E-04 | 2.2 |
| 93 | COG0839 | NADH:ubiquinone oxidoreductase subunit 6 (chain J)                            | 0.039 | 1.0E-04 | 2.2 |

---

**Supplementary Table 5. COGs of carbohydrate metabolism enriched in HE than H.** Data were derived from two-tailed Wilcoxon test on group medians with *p* values adjusted by Benjamini-Hochberg (BH) false discovery rate for multiple testing. Difference between group medians (HE minus H) and fold change (HE divide H) were also shown. COGs were sorted in ascending order of adjusted *p* values with lexical order of COG descriptions.

| #  | COG ID  | COG description                                                                                   | Adjusted<br><i>p</i> (BH) | HE minus<br>H | HE divide<br>H |
|----|---------|---------------------------------------------------------------------------------------------------|---------------------------|---------------|----------------|
| 1  | COG1449 | Alpha-amylase/alpha-mannosidase                                                                   | 0.004                     | 1.7E-04       | 3.0            |
| 2  | COG3250 | Beta-galactosidase/beta-glucuronidase                                                             | 0.004                     | 1.0E-03       | 1.3            |
| 3  | COG2376 | Dihydroxyacetone kinase                                                                           | 0.004                     | 1.3E-04       | 1.6            |
| 4  | COG3594 | Fucose 4-O-acetylase and related<br>acetyltransferases                                            | 0.004                     | 1.3E-04       | 1.5            |
| 5  | COG0738 | Fucose permease                                                                                   | 0.004                     | 5.2E-04       | 1.8            |
| 6  | COG2017 | Galactose mutarotase and related enzymes                                                          | 0.004                     | 2.0E-04       | 1.2            |
| 7  | COG3408 | Glycogen debranching enzyme                                                                       | 0.004                     | 2.8E-04       | 1.6            |
| 8  | COG2152 | Predicted glycosylase                                                                             | 0.004                     | 1.6E-04       | 1.5            |
| 9  | COG2956 | Predicted N-acetylglucosaminyl transferase                                                        | 0.004                     | 2.0E-04       | 3.1            |
| 10 | COG3537 | Putative alpha-1,2-mannosidase                                                                    | 0.004                     | 1.0E-03       | 2.8            |
| 11 | COG1877 | Trehalose-6-phosphatase                                                                           | 0.004                     | 6.5E-05       | 8.6            |
| 12 | COG0380 | Trehalose-6-phosphate synthase                                                                    | 0.004                     | 7.3E-05       | 6.2            |
| 13 | COG0363 | 6-phosphogluconolactonase/<br>Glucosamine-6-phosphate isomerase/deaminase                         | 0.004                     | 3.3E-04       | 1.7            |
| 14 | COG3525 | N-acetyl-beta-hexosaminidase                                                                      | 0.004                     | 9.4E-04       | 2.0            |
| 15 | COG0126 | 3-phosphoglycerate kinase                                                                         | 0.005                     | 6.1E-05       | 1.2            |
| 16 | COG0483 | Archaeal fructose-1,6-bisphosphatase and<br>related enzymes of inositol monophosphatase<br>family | 0.005                     | 8.5E-05       | 1.3            |
| 17 | COG2731 | Beta-galactosidase, beta subunit                                                                  | 0.005                     | 8.3E-05       | 1.3            |
| 18 | COG5039 | Exopolysaccharide biosynthesis protein                                                            | 0.005                     | 5.2E-05       | 5.2            |
| 19 | COG0153 | Galactokinase                                                                                     | 0.005                     | 7.1E-05       | 1.3            |
| 20 | COG5026 | Hexokinase                                                                                        | 0.005                     | 2.5E-05       | 5.6            |
| 21 | COG0574 | Phosphoenolpyruvate synthase/pyruvate<br>phosphate dikinase                                       | 0.005                     | 2.2E-04       | 1.4            |
| 22 | COG0061 | Predicted sugar kinase                                                                            | 0.005                     | 6.1E-05       | 1.2            |
| 23 | COG0063 | Predicted sugar kinase                                                                            | 0.005                     | 6.0E-05       | 1.2            |
| 24 | COG0021 | Transketolase                                                                                     | 0.005                     | 1.6E-04       | 2.4            |
| 25 | COG3280 | Maltooligosyl trehalose synthase                                                                  | 0.006                     | 4.5E-08       | 2.8            |
| 26 | COG0149 | Triosephosphate isomerase                                                                         | 0.006                     | 5.4E-05       | 1.1            |
| 27 | COG0451 | Nucleoside-diphosphate-sugar epimerases                                                           | 0.006                     | 5.3E-04       | 1.2            |
| 28 | COG0036 | Pentose-5-phosphate-3-epimerase                                                                   | 0.007                     | 1.1E-04       | 1.3            |
| 29 | COG1086 | Predicted nucleoside-diphosphate sugar<br>epimerases                                              | 0.007                     | 2.7E-04       | 1.5            |
| 30 | COG3717 | 5-keto 4-deoxyuronate isomerase                                                                   | 0.007                     | 9.9E-05       | 1.5            |
| 31 | COG3507 | Beta-xylosidase                                                                                   | 0.007                     | 2.7E-04       | 1.2            |
| 32 | COG0166 | Glucose-6-phosphate isomerase                                                                     | 0.007                     | 5.0E-05       | 1.1            |
| 33 | COG0469 | Pyruvate kinase                                                                                   | 0.007                     | 5.2E-05       | 1.1            |
| 34 | COG4284 | UDP-glucose pyrophosphorylase                                                                     | 0.007                     | 1.7E-05       | 1.9            |
| 35 | COG0158 | Fructose-1,6-bisphosphatase                                                                       | 0.009                     | 1.8E-05       | 2.7            |
| 36 | COG0033 | Phosphoglucomutase                                                                                | 0.009                     | 1.6E-05       | 2.6            |
| 37 | COG2971 | Predicted N-acetylglucosamine kinase                                                              | 0.009                     | 6.5E-05       | 1.3            |
| 38 | COG3961 | Pyruvate decarboxylase and related thiamine<br>pyrophosphate-requiring enzymes                    | 0.009                     | 1.7E-05       | 2.6            |
| 39 | COG0205 | 6-phosphofructokinase                                                                             | 0.010                     | 1.7E-04       | 1.2            |
| 40 | COG1830 | DhnA-type fructose-1,6-bisphosphate aldolase<br>and related enzymes                               | 0.010                     | 1.0E-04       | 1.8            |
| 41 | COG0837 | Glucokinase                                                                                       | 0.010                     | 1.6E-05       | 2.6            |
| 42 | COG0176 | Transaldolase                                                                                     | 0.010                     | 1.8E-04       | 1.9            |
| 43 | COG1312 | D-mannonate dehydratase                                                                           | 0.011                     | 6.5E-05       | 1.2            |

|    |         |                                                                                             |       |         |     |
|----|---------|---------------------------------------------------------------------------------------------|-------|---------|-----|
| 44 | COG0148 | Enolase                                                                                     | 0.011 | 3.2E-05 | 1.1 |
| 45 | COG1482 | Phosphomannose isomerase                                                                    | 0.011 | 1.8E-04 | 1.7 |
| 46 | COG0580 | Glycerol uptake facilitator and related permeases (Major Intrinsic Protein Family)          | 0.014 | 3.8E-05 | 1.6 |
| 47 | COG3936 | Protein involved in polysaccharide intercellular adhesion (PIA) synthesis/biofilm formation | 0.014 | 2.7E-08 | 4.4 |
| 48 | COG0588 | Phosphoglycerate mutase 1                                                                   | 0.016 | 4.4E-05 | 1.2 |
| 49 | COG2942 | N-acyl-D-glucosamine 2-epimerase                                                            | 0.021 | 1.3E-04 | 1.7 |
| 50 | COG0058 | Glucan phosphorylase                                                                        | 0.024 | 3.6E-05 | 1.1 |
| 51 | COG4975 | Putative glucose uptake permease                                                            | 0.024 | 5.6E-05 | 2.4 |
| 52 | COG2814 | Arabinose efflux permease                                                                   | 0.027 | 6.5E-04 | 1.4 |
| 53 | COG4409 | Neuraminidase (sialidase)                                                                   | 0.030 | 1.4E-04 | 1.8 |
| 54 | COG2273 | Beta-glucanase/Beta-glucan synthetase                                                       | 0.034 | 1.3E-04 | 1.7 |
| 55 | COG1640 | 4-alpha-glucanotransferase                                                                  | 0.044 | 5.3E-05 | 1.1 |
| 56 | COG0297 | Glycogen synthase                                                                           | 0.044 | 5.9E-05 | 1.2 |
| 57 | COG0697 | Permeases of the drug/metabolite transporter (DMT) superfamily                              | 0.049 | 9.1E-05 | 1.1 |

**Supplementary Table 6. Expression data of *Tlr4*, *Nod1* and *Nod2*.** Data of gene expression are presented as  $2^{-\Delta\Delta C_t}$ . Three mice from the major treatment groups, H\_FHE and H\_FNE, and two mice from other groups were randomly selected for this experiment.

| Group | Mouse ID | <i>Tlr4</i> | <i>Nod1</i> | <i>Nod2</i> |
|-------|----------|-------------|-------------|-------------|
| H     | 0401     | 679.7       | 960.1       | 158.9       |
| H     | 0402     | 795.1       | 1146.1      | 117.3       |
| HE    | 0201     | 592.4       | 726.3       | 34.5        |
| HE    | 0203     | 464.4       | 628.9       | 39.4        |
| H_FHE | 0601     | 650.5       | 1262.7      | 51.3        |
| H_FHE | 0602     | 483.9       | 1002.9      | 59.8        |
| H_FHE | 0607     | 622.7       | 1253.4      | 56.6        |
| H_FNE | 0701     | 528.5       | 936.8       | 67.4        |
| H_FNE | 0705     | 644.5       | 1289.2      | 104.9       |
| H_FNE | 0706     | 656.1       | 1326.0      | 67.0        |
| N     | 0301     | 490.2       | 634.6       | 50.0        |
| N     | 0302     | 519.4       | 1103.4      | 52.2        |
| NE    | 0106     | 302.8       | 652.0       | 30.4        |
| NE    | 0107     | 383.2       | 816.6       | 64.3        |
| N_FNE | 0501     | 510.0       | 1041.5      | 89.3        |
| N_FNE | 0502     | 752.6       | 996.7       | 47.9        |

**Supplementary Table 7. Magnitude of abundance changes in taxa by FMT.** The magnitude of changes in *Helicobacter*, *Odoribacter*, and AF12 by FMT were qualified by contrasting data of FMT recipient with non-FMT group at week 24 (i.e., after FMT). Data are mean relative abundance per genus and group. The last 3 columns represent the magnitude of changes in compared groups.

| Genus               | H       | H_FHE   | H_FNE   | N       | N_FNE   | H_FHE<br>divide<br>H | H_FNE<br>divide<br>H | N_FNE<br>divide<br>N |
|---------------------|---------|---------|---------|---------|---------|----------------------|----------------------|----------------------|
| AF12                | 6.7e-05 | 7.4e-03 | 8.3e-03 | 3.7e-03 | 1.7e-03 | 110.6                | 122.9                | 0.5                  |
| <i>Helicobacter</i> | 1.4e-05 | 2.4e-02 | 2.6e-02 | 2.4e-04 | 9.5e-03 | 1732.1               | 1931.9               | 39.4                 |
| <i>Odoribacter</i>  | 1.8e-05 | 5.3e-02 | 1.7e-02 | 7.0e-05 | 4.5e-03 | 3001.6               | 938.3                | 63.3                 |

**Supplementary Table 8. List of primers and probes used in qPCR.**

| Gene         | Forward primer (5' to 3') | Reverse primer (5' to 3') | UPL probe <sup>a</sup> |
|--------------|---------------------------|---------------------------|------------------------|
| <i>Tnf</i>   | CTgTAGCCCACgTCgTAGC       | TTgAgATCCATgCCgTTg        | 68                     |
| <i>Il1a</i>  | CCATAACCCATgATCTggAAG     | TTggTTgAgggAATCATTGAT     | 29                     |
| <i>Pparg</i> | ggAAAgACAACggACAAATCA     | ATTCggATggCCACCTCT        | 68                     |
| <i>Rn18s</i> | gCAATTATCCCCATgAACg       | gggACTTAATCAACgCAAgC      | 48                     |
| <i>Tlr4</i>  | ggCAGCaggTggAATTgTAT      | AggATTCgAggCTTTTCCAT      | NA                     |
| <i>Nod1</i>  | gCgAggAggTgTCTgAgTTC      | gAAggggAgAAgCCAATTC       | NA                     |
| <i>Nod2</i>  | gCTTTCTACTTggCTgTC        | gTgATTTgCaggTTgTgTgg      | NA                     |
| <i>Gapdh</i> | ACCCAgAAgACTgTggATgg      | CACATTgggggTAggAACAC      | NA                     |

<sup>a</sup>UPL probes were purchased from Roche Molecular Biochemicals. UPL, universal probe library. NA, not applicable.



## References

- 1 Cox, L. M. & Blaser, M. J. Antibiotics in early life and obesity. *Nat Rev Endocrinol* **11**, 182-190, doi:10.1038/nrendo.2014.210 (2015).
- 2 Cho, I. *et al.* Antibiotics in early life alter the murine colonic microbiome and adiposity. *Nature* **488**, 621-626, doi:10.1038/nature11400 (2012).
- 3 Cani, P. D. *et al.* Metabolic endotoxemia initiates obesity and insulin resistance. *Diabetes* **56**, 1761-1772, doi:10.2337/db06-1491 (2007).
- 4 Chi, W. *et al.* Bacterial peptidoglycan stimulates adipocyte lipolysis via NOD1. *PLoS One* **9**, e97675, doi:10.1371/journal.pone.0097675 (2014).
